# Supplementary material
Source: PubMed Central journal article supplement (PMC4346632)
Supplement: ncomms7266-s1.pdf [file ncomms7266-s1.pdf]

## Supplementary Figure 1

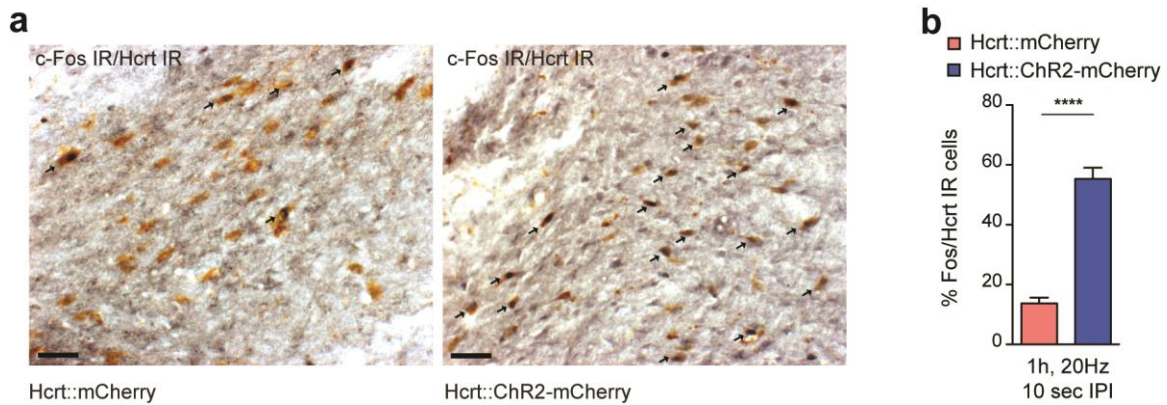

**(a-b)** *In vivo* bilateral photostimulation in Hcrt::ChR2-mCherry mice selectively activates Hcrt neurons. **(a)** Representative photomicrographs of LHA sections co-stained for c-Fos (black) and Hcrt (brown) from Hcrt::mCherry ( $n = 7$ ) and Hcrt::ChR2-mCherry ( $n = 7$ ) mice. Black arrows indicate dual-labeled neurons with both anti-Hcrt and -cFos antibodies. Scale bar: 50  $\mu\text{m}$ . **(b)** Bar graphs quantify the percentage of Hcrt IR neurons expressing c-Fos after 1h photostimulation at 20Hz, 10 s IPI, in Hcrt::mCherry control mice (red,  $n = 7$ ) and Hcrt::ChR2-mCherry mice (blue,  $n = 7$ ). \*\*\*\* $P < 0.0001$  two-tailed unpaired Student's  $t$  test between transduced mice. Data represent means  $\pm$  s.e.m.

## Supplementary Figure 2

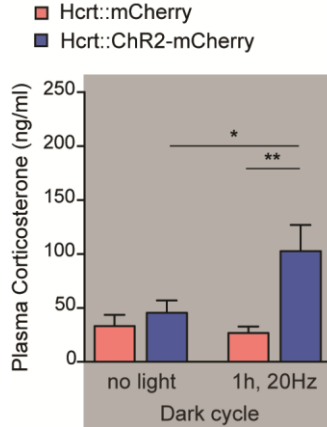

Hcrt-evoked increase in plasma corticosterone levels is circadian-independent. *In vivo* bilateral photostimulation of Hcrt neurons in Hcrt::ChR2-mCherry mice (blue,  $n = 10$ ) evoked a significant elevation of plasma corticosterone, but not in Hcrt::mCherry control mice (red,  $n = 11$ ). \*\* $P < 0.01$ , two-way repeated measures ANOVA between viral transduction and stimulation condition; \* $P < 0.05$ , \*\* $P < 0.01$ , two-tailed Student's  $t$  test.

### Supplementary Figure 3

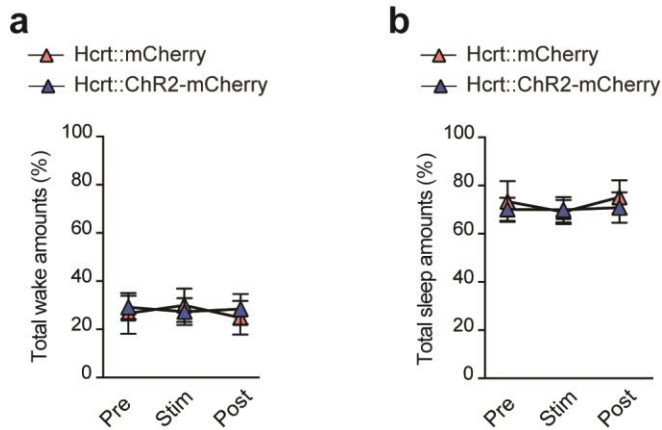

**(a–b)** Consequences of persistent activation of Hcrt neurons on wake and sleep quantities. Total amount of wake **(a)** and total amount of total sleep (Non-REM and REM sleep, **(b)**) in % of total time recorded in Hcrt::mCherry (red,  $n = 7$ ) and Hcrt::ChR2-mCherry mice (blue,  $n = 9$ ) averaged over 1h before (Pre), during (Stim) and after (Post) 20Hz, 10 s IPI photostimulation of Hcrt neurons. While stimulated ChR2 mice exhibit higher sleep fragmentation with increased sleep-to-wake transitions and microarousal events (Fig. 2a,b), total wake and sleep quantities were unchanged compare with baseline and control animals.  $P = 0.50$  **(a)**,  $P = 0.99$  **(b)**, two-way repeated measures ANOVA between viral transduction and stimulation condition;  $P = 0.94$  **(a)**,  $P = 0.97$  **(b)**, repeated measures one-way ANOVA followed by Tukey's *post-hoc* test and two-tailed Student's *t* test between transduced mice.

## Supplementary Figure 4

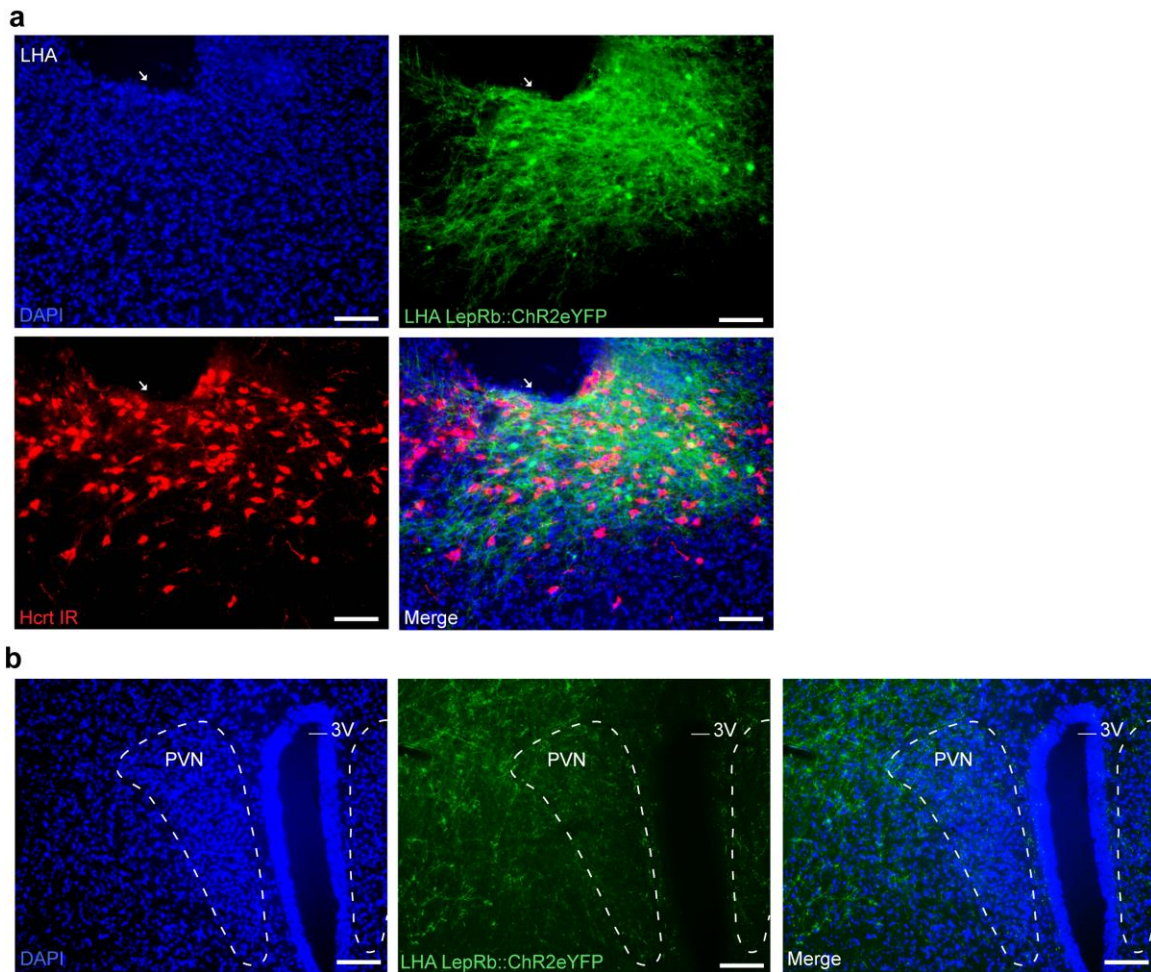

**(a-b)** Virus diffusion and transgenes expression in the LHA and PVN region of *LepRb::cre* mice. **(a)** Representative photomicrographs illustrating viral ChR2-eYFP expression ( $n = 9$ ) in LHA *LepRb::cre* neurons (green) directly below fiber track intermingled with Hcrt neurons labeled with an anti-Hcrt antibody (red) and counterstained with DAPI (blue). White arrows show the location and tip of the optical fiber. Scale bar: 100  $\mu\text{m}$ . **(b)** Representative photomicrographs of LHA *LepRb::ChR2-eYFP* neurons projections to the PVN region (green) counterstained with DAPI (blue). Some ChR2-eYFP terminals are found in the anterior nucleus of the hypothalamus but not within the PVN ( $n = 9$ ). White dotted lines delineate PVN. Scale bar: 100  $\mu\text{m}$ .
